# Supplementary material
Source: ML conference proceedings conference paper supplement (https://openreview.net/forum?id=TnrZkMCbk3L)

Input Image  
(1, X, Y, Z)

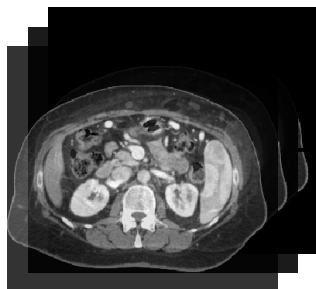

Custom Resize

(1, 128, 128, 64)

Abdomen Region Segmentor

De-Crop

(14, 192, 192, 96)

Masked Output

Abdomen Organs Segmentor

Crop and  
Resize

(1, 192, 192, 96)

Abdomen Region

Final Output Mask  
(14, X, Y, Z)

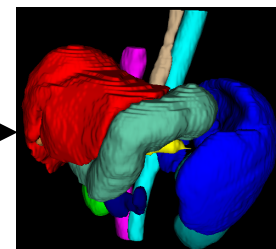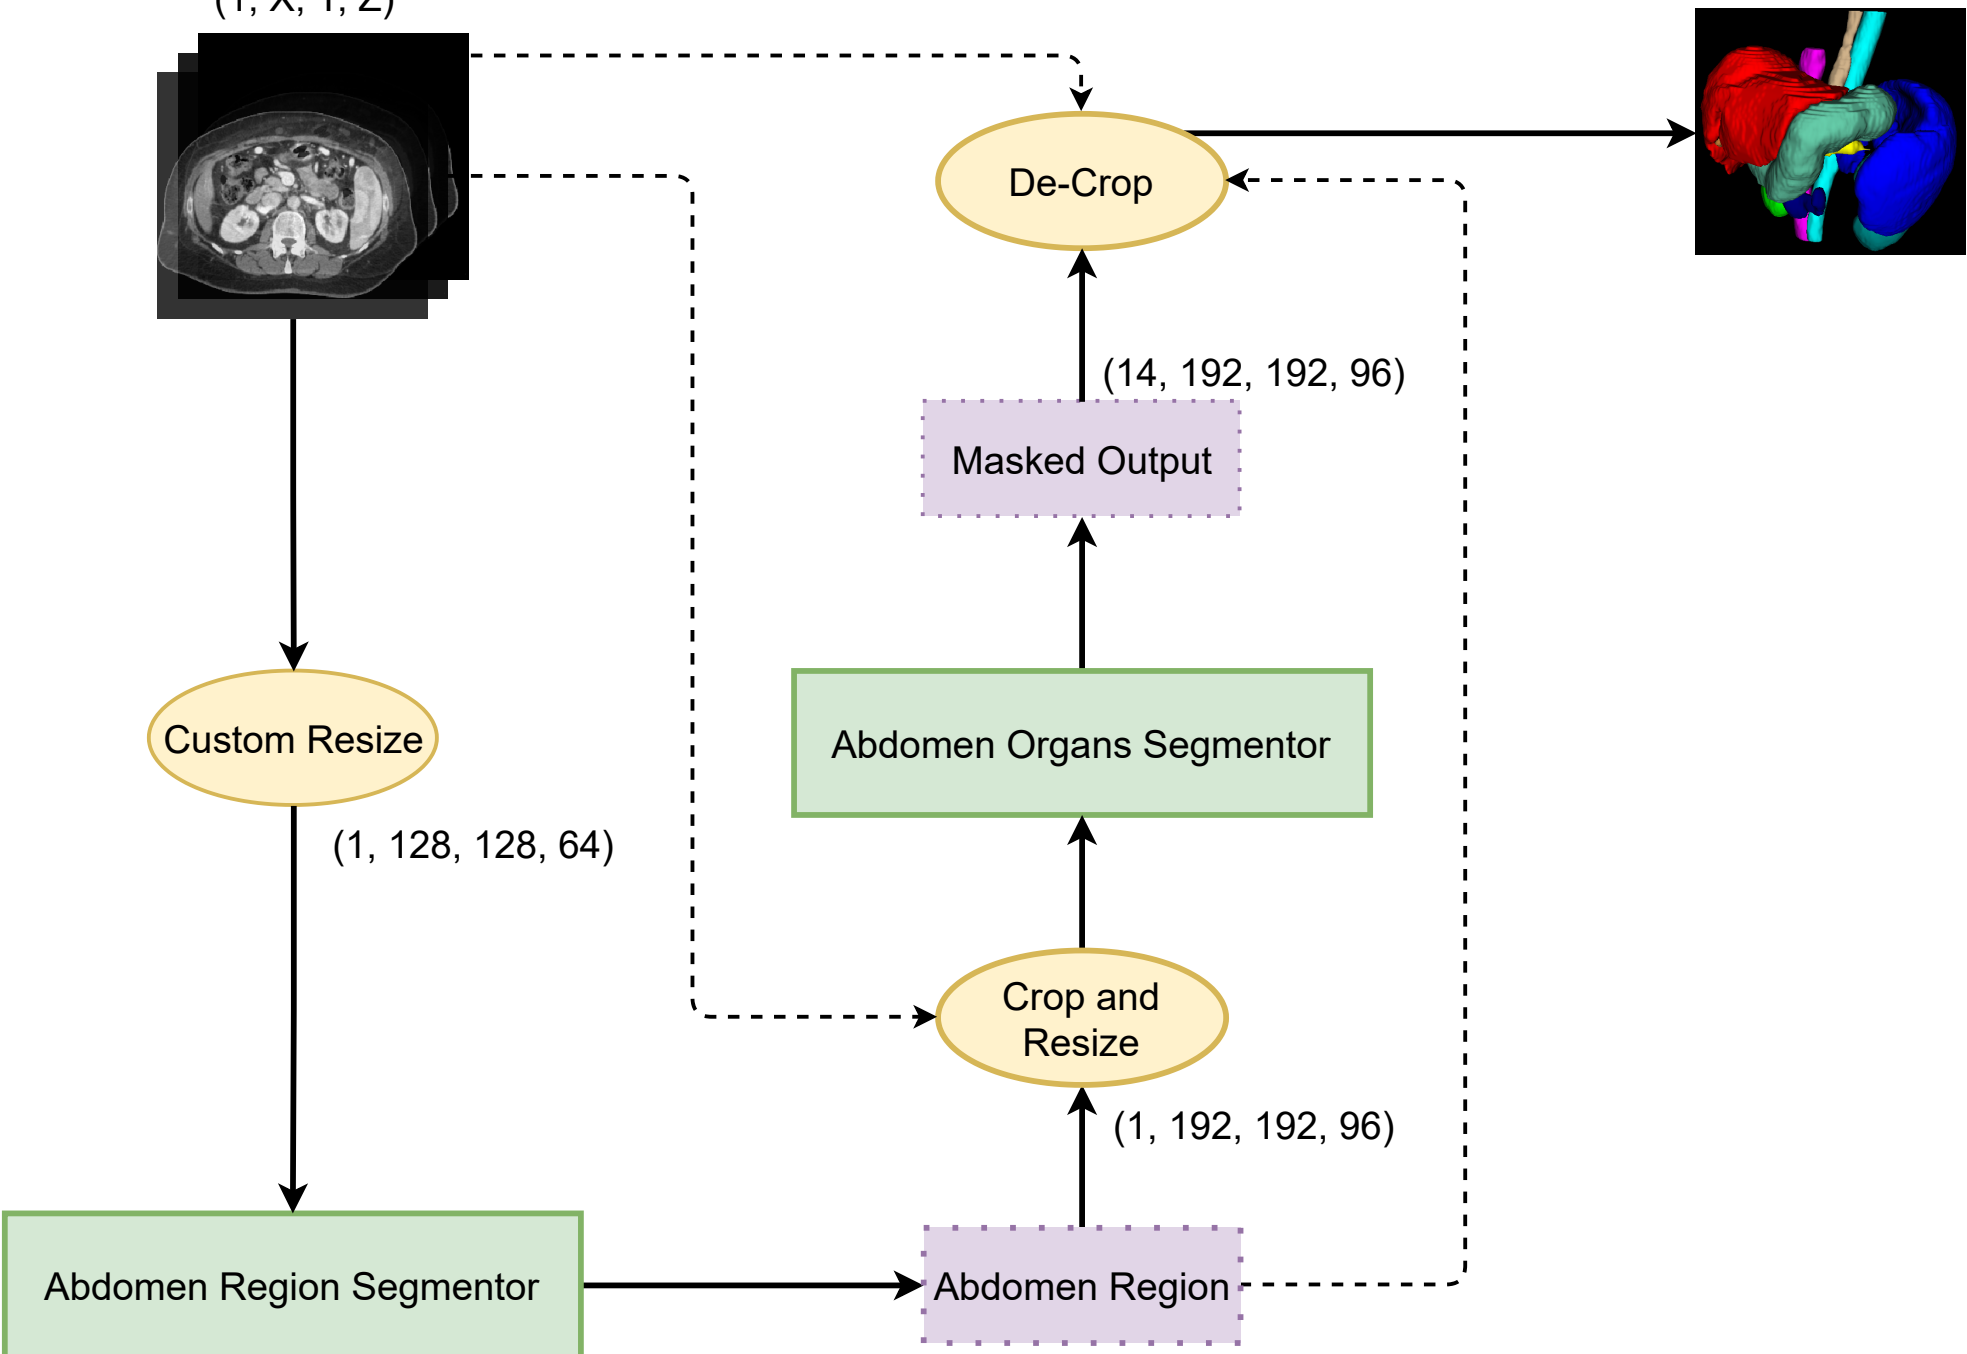

Supplement: supplementary_material [file attachment]
